# Supplementary material for: Fermentation of Corn By-Products: From Agrifood Waste to Higher Value Antioxidant Products
Source: MDPI journal article supplement (doi:10.3390/fermentation9040373), 2023-04-13
Supplement: s1 [file s1]

# Fermentation of Corn By-Products: From Agrifood Waste to Higher Value Antioxidant Products

Federica Tonolo <sup>1,2</sup>, Alessandra Folda <sup>1</sup>, Stefania Ferro <sup>1</sup>, Roberta Seraglia <sup>3</sup>, Angiolella Lombardi <sup>4</sup>, Christian Andrichetto <sup>5</sup>, Alessia Giannoni <sup>6</sup>, Oriano Marin <sup>1</sup> and Maria Pia Rigobello <sup>1,\*</sup>

<sup>1</sup> Department of Biomedical Sciences, University of Padova, Via Ugo Bassi 58/b, 35131 Padova, Italy; federica.tonolo@unipd.it (F.T.); alessandra.folda.1@unipd.it (A.F.); stefania.ferro.1@unipd.it (S.F.)

<sup>2</sup> Department of Comparative Biomedicine and Food Science, University of Padova, Viale dell'Università, Legnaro, 35020 Padova, Italy

<sup>3</sup> Consiglio Nazionale delle Ricerche, Institute of Condensed Matter Chemistry and Technologies for Energy (CNR-ICMATE), Corso Stati Uniti 4, 35127 Padova, Italy; roberta.seraglia@cnr.it

<sup>4</sup> Food Microbiologist, 36100 Vicenza, Italy; angiolella.lombardi@gmail.com

<sup>5</sup> Agenzia Veneta per l'Innovazione nel Settore Primario, Via San Gaetano 74, 36016 Thiene, Italy; cristian.andrichetto@venetoagricoltura.org

<sup>6</sup> Favero Antonio S.R.L., Via Gramogne 60-63, 35127 Padova, Italy; alessia.giannoni@molinofavero.com

\* Correspondence: mariapia.rigobello@unipd.it

## Supplementary Material

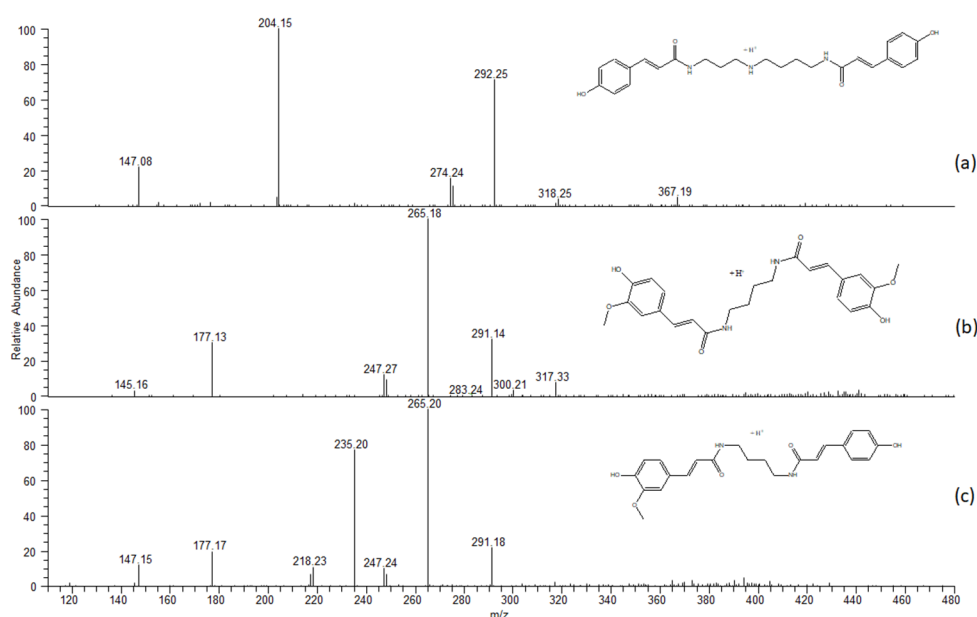

Figure S1. MS/MS spectra of [M+H]<sup>+</sup> ions of: (a) dicoumaroyl spermidine (DCS, m/z 438), (b) diferuloyl putrescine (DFP, m/z 441) and (c) coumaroyl feruloyl putrescine (CFP, m/z 411).

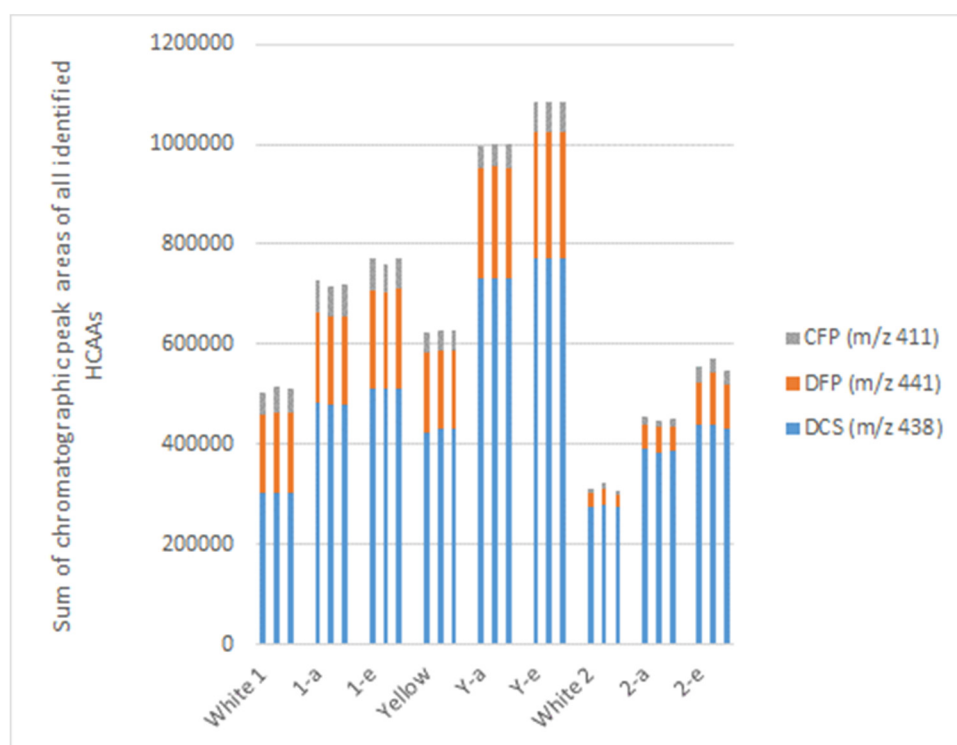

Figure S2. Detailed variation of the sum of the chromatographic peak areas of  $[M+H]^+$  ions of DCS, DFP and CFP for the three analyzed corn by-products.
